# Supplementary material for: Preparation and structures of novel silamacrocyclic compounds: silacalix[4]quinone and silacalix[4]hydroquinone octamethyl etherDedicated to Prof. Mitsuo Kira on the occasion of his 60th birthday.Electronic supplementary information (ESI) available: experimental procedures, spectral data and X-ray data of the products. See http://www.rsc.org/suppdata/cc/b3/b307048d/
Source: Royal Society of Chemistry journal article supplement (doi:10.1039/b307048d), 2003-01-01
Supplement: b307048d.pdf [file b307048d.pdf]

## Supplementary Information for the communication entitled “Preparation and Structures of Novel Silamacrocyclic Compounds: Silacalix[4]quinone and Silacalix[4]hydroquinone Octamethyl Ether”

Shinobu Tsutsui\*<sup>a</sup> and Kenkichi Sakamoto\*<sup>ab</sup>

<sup>a</sup>Photodynamics Research Center, The Institute of Physical and Chemical Research (RIKEN), 519-1399, Aoba, Aramaki, Aoba-ku, Sendai 980-0845, Japan; E-mail: stsutsui@postman.riken.go.jp

<sup>b</sup>Department of Chemistry, Graduate School of Science, Tohoku University, Aoba-ku, Sendai 980-8578, Japan; E-mail: sakamoto@si.chem.tohoku.ac.jp

### Experimental

#### Preparation of **8**

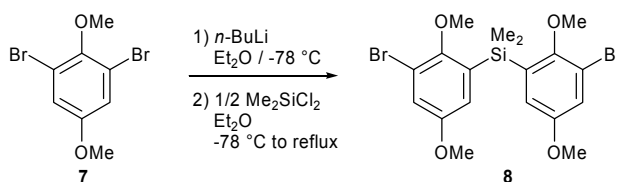

To a Et<sub>2</sub>O (500 ml) solution of **7** (21.6 g, 73.0 mmol) was added a hexane (48.0 ml) solution of *n*-BuLi (1.55 N, 74.4 mmol) at -78 °C. The mixture was stirred at -78 °C for 2 h. Then a Et<sub>2</sub>O (10 ml) solution of Me<sub>2</sub>SiCl<sub>2</sub> (4.71 g, 36.5 mmol) was added to the solution at -78 °C. After stirring at room temperature for 1 night and under reflux for 1 h, the mixture was hydrolyzed with water. The organic layer was separated, and the aqueous layer was extracted with hexane. The organic layer and the extracts were combined, washed with water and brine, dried over Mg<sub>2</sub>SO<sub>4</sub>, and filtered. The filtrate was concentrated and distillation gave **8** (11.4 g, 23.3 mmol, 64%). **8**: colorless crystals; mp 84-84.5 °C; bp 180-220 °C / 0.8 mmHg; <sup>1</sup>H NMR (CDCl<sub>3</sub>, δ) 0.58 (s, 6H), 3.47 (s, 6H), 3.74 (s, 6H), 6.92 (d, J = 2.7 Hz, 2H), 7.08 (d, J = 2.7 Hz, 2H); <sup>13</sup>C NMR (CDCl<sub>3</sub>, δ) -1.47, 55.66, 61.13, 116.48, 119.61, 120.52, 134.16, 155.26, 155.82; <sup>29</sup>Si NMR (CDCl<sub>3</sub>, δ) -8.56; MS (70 eV) m/z 488 (M<sup>+</sup>). Anal. Calcd for C<sub>18</sub>H<sub>22</sub>Br<sub>2</sub>O<sub>4</sub>Si: C, 44.10; H, 4.52%; Found: C, 44.10; H, 4.71%.

#### Preparation of **5**

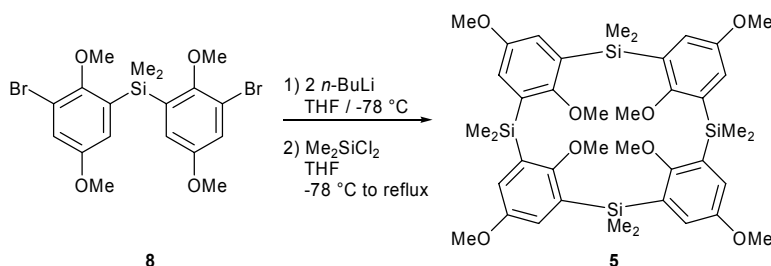

To a THF (200 ml) solution of **8** (1.12 g, 2.29 mmol) was added a hexane (3.1 ml) solution of

*n*-BuLi (1.55 N, 4.81 mmol) at  $-78\text{ }^{\circ}\text{C}$ . The mixture was stirred at  $-78\text{ }^{\circ}\text{C}$  for 2 h. Then  $\text{Me}_2\text{SiCl}_2$  (0.28 ml, 2.31 mmol) was added to the solution at  $-78\text{ }^{\circ}\text{C}$ . After stirring at  $-78\text{ }^{\circ}\text{C}$  for 1 h, at room temperature for 1 night, and under reflux for 1 h, the mixture was hydrolyzed with water. The organic layer was separated, and the aqueous layer was extracted with hexane. The organic layer and the extracts were combined, washed with water and brine, dried over  $\text{Mg}_2\text{SO}_4$ , and filtered. The filtrate was concentrated under reduced pressure, and separated by using recycle GPC with  $\text{CHCl}_3$  solution to give **5** (81.0 mg, 0.104 mmol, 9.1%). **5**: colorless crystals; mp  $294\text{-}294.5\text{ }^{\circ}\text{C}$ ;  $^1\text{H}$  NMR ( $\text{CDCl}_3$ ,  $\delta$ ) 0.51 (s, 24H), 2.68 (s, 12H), 3.78 (s, 12H), 7.04 (s, 8H);  $^{13}\text{C}$  NMR ( $\text{CDCl}_3$ ,  $\delta$ ) -0.57, 55.56, 61.61, 121.82, 132.52, 154.51, 164.05;  $^{29}\text{Si}$  NMR ( $\text{CDCl}_3$ ,  $\delta$ ) -11.16; MS (70 eV)  $m/z$  777 ( $\text{M}^+$ ). Anal. Calcd for  $\text{C}_{40}\text{H}_{56}\text{O}_8\text{Si}_4$ : C, 61.81; H, 7.26%, Found: C, 61.71; H, 7.14%.

### Preparation of 4

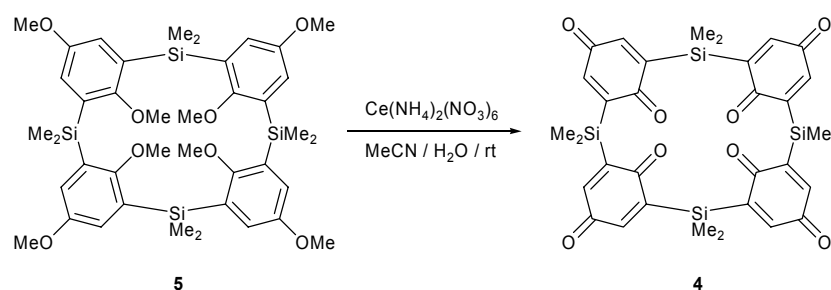

A mixture of **5** (81.0 mg, 0.104 mmol),  $\text{Ce}(\text{NH}_4)_2(\text{NO}_3)_6$  (3.68 g, 6.72 mmol),  $\text{CH}_3\text{CN}$  (50 ml), and  $\text{H}_2\text{O}$  (35 ml) was stirred at room temperature for 2 days. The mixture was hydrolyzed with water. The organic layer was separated, and the aqueous layer was extracted with chloroform. The organic layer and the extracts were combined, washed with water and brine, dried over  $\text{MgSO}_4$ , and filtered. The filtrate was concentrated under reduced pressure, and separated by using recycle GPC with  $\text{CHCl}_3$  solution to give **4** (10.7 mg,  $1.62 \times 10^{-5}$  mol, 16%). **4**: orange crystals; mp  $163\text{-}165\text{ }^{\circ}\text{C}$  (decomp.);  $^1\text{H}$  NMR ( $\text{CDCl}_3$ ,  $\delta$ ) 0.29 (s, 24H), 6.95 (s, 8H);  $^{13}\text{C}$  NMR ( $\text{CDCl}_3$ ,  $\delta$ ) -4.26, 144.18, 150.12, 185.15, 192.44;  $^{29}\text{Si}$  NMR ( $\text{CDCl}_3$ ,  $\delta$ ) -11.92; MS (70 eV)  $m/z$  656 ( $\text{M}^+$ ); FAB-HRMS  $m/z$  found 657.1269 [ $\text{M}+\text{H}^+$ ], calcd for  $\text{C}_{32}\text{H}_{33}\text{O}_8\text{Si}_4$ , 657.1253; IR  $\nu_{\text{C=O}}$  1648, 1653  $\text{cm}^{-1}$ ; UV ( $\text{CH}_2\text{Cl}_2$ )  $\lambda_{\text{max/nm}}$  ( $\epsilon$ ) 249 (32300).

### Preparation of 11

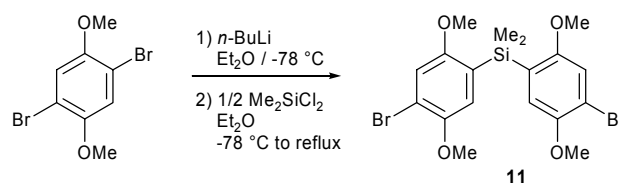

To a  $\text{Et}_2\text{O}$  (700 ml) solution of 1,4-dibromo-2,5-dimethoxybenzene (48.0 g, 162 mmol) was added a hexane (108 ml) solution of *n*-BuLi (1.55 N, 167 mmol) at  $-78\text{ }^{\circ}\text{C}$ . The mixture was stirred at  $-78\text{ }^{\circ}\text{C}$  for 1.5 h. Then a  $\text{Et}_2\text{O}$  (20 ml) solution of  $\text{Me}_2\text{SiCl}_2$  (10.4 g, 80.4 mmol) was

added to the solution at  $-78\text{ }^{\circ}\text{C}$ . After stirring at room temperature for 1 night and under reflux for 1.5 h, the mixture was hydrolyzed with water. The organic layer was separated, and the aqueous layer was extracted with hexane. The organic layer and the extracts were combined, washed with water and brine, dried over  $\text{Mg}_2\text{SO}_4$ , and filtered. The filtrate was concentrated and distillation gave **11** (18.3 g, 37.3 mmol, 46%). **11**: colorless crystals; mp  $67.6\text{--}67.8\text{ }^{\circ}\text{C}$ ;  $^1\text{H}$  NMR ( $\text{CDCl}_3$ ,  $\delta$ ) 0.52 (s, 6H), 3.67 (s, 6H), 3.76 (s, 6H), 6.84 (s, 2H), 7.02 (s, 2H);  $^{13}\text{C}$  NMR ( $\text{CDCl}_3$ ,  $\delta$ )  $-2.23$ , 55.88, 56.94, 113.67, 115.30, 119.62, 126.07, 149.99, 158.59;  $^{29}\text{Si}$  NMR ( $\text{CDCl}_3$ ,  $\delta$ )  $-7.77$ ; MS (70 eV)  $m/z$  488 ( $\text{M}^+$ ). Anal. Calcd for  $\text{C}_{18}\text{H}_{22}\text{Br}_2\text{O}_4\text{Si}$ : C, 44.10; H, 4.52%, Found: C, 43.99; H, 4.66%.

### Preparation of 12

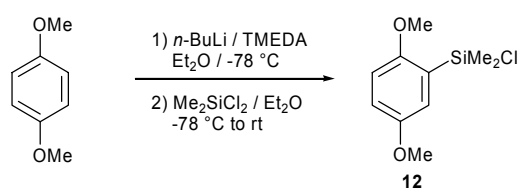

To a mixture of 1,4-dimethoxybenzene (15.2 g, 110 mmol), TMEDA (18.0 ml, 119 mmol), and  $\text{Et}_2\text{O}$  (450 ml) was added a hexane (72.0 ml) solution of  $n\text{-BuLi}$  (1.55 N, 112 mmol) at room temperature. After the mixture was stirred for 17 h at room temperature, the mixture was added to a  $\text{Et}_2\text{O}$  (500 ml) solution of  $\text{Me}_2\text{SiCl}_2$  (18.0 ml, 131 mmol) at  $0\text{ }^{\circ}\text{C}$ . After it was stirred at  $0\text{ }^{\circ}\text{C}$  for 5 h and at room temperature for 3 h, distillation gave **12** (20.0 g, 86.5 mmol, 79%) as a pale yellow oil. **12**: bp  $110\text{--}175\text{ }^{\circ}\text{C} / 1\text{ mmHg}$ ;  $^1\text{H}$  NMR ( $\text{CDCl}_3$ ,  $\delta$ ) 0.64 (s, 6H), 3.776 (s, 3H), 3.782 (s, 3H), 6.7–6.9 (m, 2H), 7.19 (d,  $J = 3\text{ Hz}$ , 1H);  $^{13}\text{C}$  NMR ( $\text{CDCl}_3$ ,  $\delta$ ) 3.08, 56.06, 56.09, 111.12, 117.15, 121.06, 125.20, 153.96, 158.17;  $^{29}\text{Si}$  NMR ( $\text{CDCl}_3$ ,  $\delta$ ) 20.56; MS (70 eV)  $m/z$  230 ( $\text{M}^+$ ). Anal. Calcd for  $\text{C}_{11}\text{H}_{15}\text{ClO}_2\text{Si}$ : C, 52.05; H, 6.55%, Found: C, 52.35; H, 6.71%.

### Preparation of 13

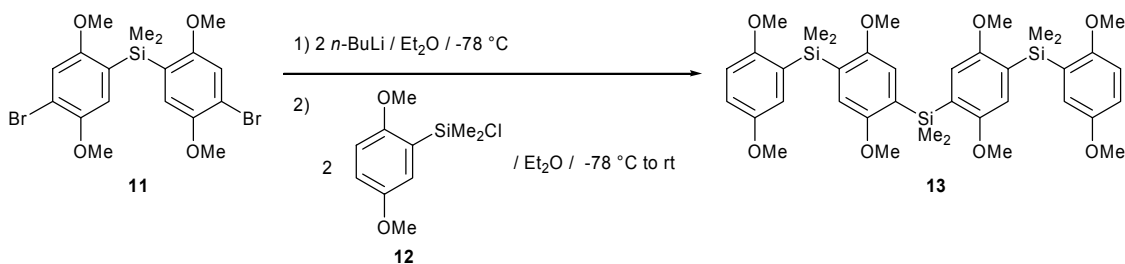

To a mixture of **11** (3.49 g, 7.11 mmol) and  $\text{Et}_2\text{O}$  (300 ml) was added a hexane (10.0 ml) solution of  $n\text{-BuLi}$  (1.55 N, 15.5 mmol) at  $-78\text{ }^{\circ}\text{C}$ . After it was stirred for 2 h, a  $\text{Et}_2\text{O}$  (20 ml) solution of **12** (3.50 g, 15.2 mmol) was added to the mixture at  $-78\text{ }^{\circ}\text{C}$ . After it was stirred for 1.5 h at  $-78\text{ }^{\circ}\text{C}$  and at room temperature for 16 h, a workup similar to that for **5** gave **13** (3.16 g, 1.35 mmol, 62%). **13**: colorless crystals; mp  $38\text{--}39\text{ }^{\circ}\text{C}$ ;  $^1\text{H}$  NMR ( $\text{CDCl}_3$ ,  $\delta$ ) 0.53 (s, 12H), 0.54 (s, 6H), 3.59 (s, 6H), 3.60 (s, 6H), 3.67 (s, 6H), 3.71 (s, 6H), 6.7–6.9 (m, 10H);  $^{13}\text{C}$  NMR ( $\text{CDCl}_3$ ,  $\delta$ )  $-1.91$

(4C), -1.85 (2C), 55.64 (2C), 55.69 (2C), 55.78 (2C), 55.80 (2C), 110.50 (2C), 114.63 (2C), 117.43 (2C), 117.73 (2C), 122.21 (2C), 127.94 (2C), 128.49 (2C), 128.74 (2C), 153.35 (2C), 158.39 (4C), 158.57 (2C);  $^{29}\text{Si}$  NMR ( $\text{CDCl}_3$ ,  $\delta$ ) -8.46; MS (70 eV)  $m/z$  721 ( $\text{M}^+$ ). Anal. Calcd for  $\text{C}_{38}\text{H}_{52}\text{O}_8\text{Si}_3$ : C, 63.30; H, 7.27%; Found: C, 63.06; H, 7.54%. UV ( $\text{CH}_2\text{Cl}_2$ )  $\lambda_{\text{max/nm}}$  ( $\epsilon$ ) 307 (28300).

### Preparation of 9

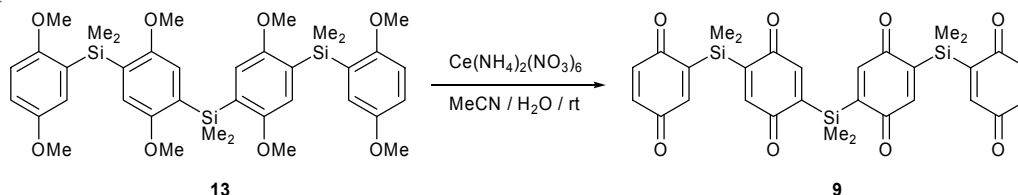

A mixture of **13** (502 mg, 0.696 mmol),  $\text{Ce}(\text{NH}_4)_2(\text{NO}_3)_6$  (10.1 g, 18.4 mmol),  $\text{CH}_3\text{CN}$  (400 ml), and  $\text{H}_2\text{O}$  (250 ml) was stirred at room temperature for 16 h. A workup similar to that for **4** gave **9** (191 mg, 0.319 mmol, 46%). **9**: orange crystals; mp 214 °C (decomp.);  $^1\text{H}$  NMR ( $\text{CDCl}_3$ ,  $\delta$ ) 0.436 (s, 6H), 0.441 (s, 12H), 6.7-6.75 (m, 4H), 6.869 (s, 2H), 6.871 (s, 2H), 6.9-6.95 (m, 2H);  $^{13}\text{C}$  NMR ( $\text{CDCl}_3$ ,  $\delta$ ) -3.64 (2C), -3.62 (4C), 136.60 (2C), 137.62 (2C), 144.48 (2C), 145.64 (4C), 148.79 (4C), 148.87 (2C), 186.16 (2C), 189.00 (4C), 190.30 (2C);  $^{29}\text{Si}$  NMR ( $\text{CDCl}_3$ ,  $\delta$ ) -10.60; HRMS  $m/z$  found 600.1068, calcd for  $\text{C}_{30}\text{H}_{28}\text{O}_8\text{Si}_3$ , 600.1090; IR  $\nu_{\text{C=O}}$  1639  $\text{cm}^{-1}$ ; UV ( $\text{CH}_2\text{Cl}_2$ )  $\lambda_{\text{max/nm}}$  ( $\epsilon$ ) 250 (52000), 434 (sh, 1810). Anal. Calcd for  $\text{C}_{30}\text{H}_{28}\text{O}_8\text{Si}_3$ : C, 59.97; H, 4.70%; Found: C, 59.52; H, 5.07%.

### Preparation of 14

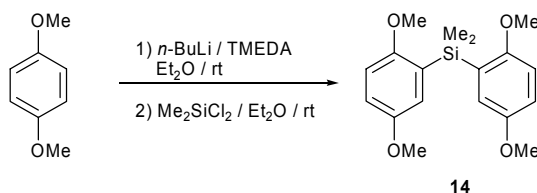

To a mixture of 1,4-dimethoxybenzene (40.4 g, 292 mmol), TMEDA (35.4 g, 305 mmol), and  $\text{Et}_2\text{O}$  (500 ml) was added a hexane (195 ml) solution of  $n\text{-BuLi}$  (1.51 N, 292 mmol) at room temperature. After it was stirred for 14 h at room temperature, a  $\text{Et}_2\text{O}$  (20 ml) solution of  $\text{Me}_2\text{SiCl}_2$  (19.1 g, 148 mmol) was added to the mixture at room temperature. After it was stirred for 5.5 h at room temperature, the mixture was hydrolyzed with water. The organic layer was separated, and the aqueous layer was extracted with hexane. The organic layer and the extracts were combined, washed with water and brine, dried over  $\text{MgSO}_4$ , and filtered. The filtrate was concentrated under reduced pressure. Recrystallization from the solution of  $\text{CHCl}_3/\text{EtOH}$  gave **14** (36.7 g, 110 mmol, 76%). **14**: colorless crystals; mp 77-80 °C;  $^1\text{H}$  NMR ( $\text{CDCl}_3$ ,  $\delta$ ) 0.52 (s, 6H), 3.67 (s, 6H), 3.71 (s, 6H), 6.7-6.9 (m, 6H);  $^{13}\text{C}$  NMR ( $\text{CDCl}_3$ ,  $\delta$ ) -1.96, 55.68, 55.76, 110.69, 114.82, 122.02, 127.74, 153.37, 158.62;  $^{29}\text{Si}$  NMR ( $\text{CDCl}_3$ ,  $\delta$ ) -8.48; MS (70 eV)  $m/z$  332 ( $\text{M}^+$ ). Anal. Calcd for  $\text{C}_{18}\text{H}_{24}\text{O}_4\text{Si}$ : C, 65.03; H, 7.28%; Found: C, 64.80; H, 7.22%. UV ( $\text{CH}_2\text{Cl}_2$ )  $\lambda_{\text{max/nm}}$  ( $\epsilon$ ) 301 (7730).

## Preparation of **10**

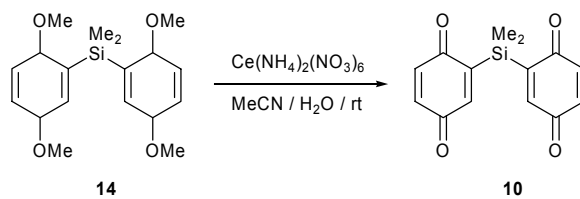

A mixture of **14** (1.40 g, 4.20 mmol),  $\text{Ce}(\text{NH}_4)_2(\text{NO}_3)_6$  (11.1 g, 20.3 mmol),  $\text{CH}_3\text{CN}$  (65 ml), and  $\text{H}_2\text{O}$  (50 ml) was stirred at room temperature for 6 h. A workup similar to that for **4** gave **10** (702 mg, 2.58 mmol, 61%). **10**: orange crystals; mp 106-107.5 °C;  $^1\text{H}$  NMR ( $\text{CDCl}_3$ ,  $\delta$ ) 0.45 (s, 6H), 6.7-6.75 (m, 4H), 6.9-6.95 (m, 2H);  $^{13}\text{C}$  NMR ( $\text{CDCl}_3$ ,  $\delta$ ) -3.61, 136.61, 137.59, 144.44, 148.89, 186.11, 190.25;  $^{29}\text{Si}$  NMR ( $\text{CDCl}_3$ ,  $\delta$ ) -9.52; MS (70 eV)  $m/z$  272 ( $\text{M}^+$ ); Anal. Calcd for  $\text{C}_{14}\text{H}_{12}\text{O}_4\text{Si}$ : C, 61.75; H, 4.44%; Found: C, 61.58; H, 4.54%. IR  $\nu_{\text{C=O}}$  1648, 1656  $\text{cm}^{-1}$ ; UV ( $\text{CH}_2\text{Cl}_2$ )  $\lambda_{\text{max/nm}}$  ( $\epsilon$ ) 249 (27100), 368 (sh, 120).
